# Supplementary material for: Healthcare Workers Attitudes, Practices and Sources of Information for COVID-19 Vaccination: An Italian National Survey
Source: Int J Environ Res Public Health. 2022 Jan 10;19(2):733. doi: 10.3390/ijerph19020733 (PMC8775438; doi:10.3390/ijerph19020733)
Supplement: Supplementary file 1 [file ijerph-19-00733-s001.zip › ijerph-1503567-supplementary.pdf]

## Supplementary Materials

### S1: Questionnaire

Survey Covid-19 across Italian Healthcare Workers

**1. SEX:**

- ☐ Male
- ☐ Female

**2. AGE :**

- ☐ < 31
- ☐ 31-40
- ☐ 41-50
- ☐ 51-60
- ☐ 60

**3. LENGHT OF SERVICE (YEARS):**

- ☐ < 6
- ☐ 6-10
- ☐ 11-15
- ☐ 16-20
- ☐ 21-25
- ☐ 26-30
- ☐ 31-35
- ☐ > 35

**4. EDUCATION:**

- ☐ Elementary school
- ☐ Secondary school leaving certificate
- ☐ High school diploma
- ☐ Bachelor degree
- ☐ Master degree
- ☐ Post-graduate diploma or a specializing master
- ☐ Other (specify)

**5. PROFESSION**

- ☐ Medical doctor
- ☐ Nurse
- ☐ Healthcare assistant
- ☐ Midwife
- ☐ Pharmacist
- ☐ Biologist
- ☐ Psicologist
- ☐ Other degree (physicists, chemists, engineers, ...)
- ☐ Healthcare technician
- ☐ Auxiliary nurse (Healthcare operator)
- ☐ Other (specify)

**6. AREA OF SERVICE**

- ☐ Health management
- ☐ Hospital hygiene and infection control
- ☐ Occupational medicine
- ☐ Infectious diseases
- ☐ Medical area
- ☐ Surgical area
- ☐ Nursing home
- ☐ Territorial medicine
- ☐ Administration
- ☐ Other (specify)

**7. PLACE OF WORK (CITY)**

**8. PLACE OF WORK (REGION)**

**9. IN THE PAST YEARS HAVE YOU SUBJECTED TO ANTI-FLU VACCINATION?**

- |               | Yes                      | No                       |
|---------------|--------------------------|--------------------------|
| • 2018 -2019  | <input type="checkbox"/> | <input type="checkbox"/> |
| • 2019 – 2020 | <input type="checkbox"/> | <input type="checkbox"/> |
| • 2020 – 2021 | <input type="checkbox"/> | <input type="checkbox"/> |

**10. HAVE YOU BEEN IN CONTACT WITH SUSPECTED OR CERTIFIED CASES COVID-19?**

- ☐ Yes
- ☐ No

**11. HAVE YOU WORKED / DO YOU WORK IN A COVID DEPARTMENT?**

- ☐ Yes
- ☐ No

**12. AMONG THOSE INDICATED BELOW, DO YOU THINK YOU HAVE RISK FACTORS FOR SERIOUS MANIFESTATIONS DUE TO COVID-19? MULTIPLE ANSWERS ARE POSSIBLE**

- ☐ None
- ☐ Diabetes
- ☐ Obesity
- ☐ Cardiovascular diseases
- ☐ Autoimmune diseases
- ☐ Lung diseases

**13. HOW DO YOU ASSESS THE FOLLOWING STATEMENTS?**

True   False   Don't Know

- Obesity is a risk factor for the severe form of COVID-19 at all ages: ☐ ☐ ☐
- Belonging to the age group  $\geq 50$  - 60 years is the main risk factor to develop a severe form of covid-19 ☐ ☐ ☐
- Prolonged symptoms (fatigue, anxiety ...) are often reported as consequences of COVID-19 infection ☐ ☐ ☐

**14. HAVE YOU EVER BEEN INFECTED BY COVID-19?**

- ☐ No
- ☐ Yes, asymptomatic, treated at home
- ☐ Yes, symptomatic, hospitalized
- ☐ Yes, serious, admitted to intensive care

**15. WHAT IS YOUR LEVEL OF CONCERN REGARDING COVID-19?**

- ☐ Very low
- ☐ Low
- ☐ Medium
- ☐ High
- ☐ Very high

**16. HOW DO YOU ASSESS THE LEVEL OF YOUR KNOWLEDGE ABOUT COVID-19 AND VACCINES?**

- |                               | Very low                 | Low | Medium | High                     | Very high                |                          |                          |                          |
|-------------------------------|--------------------------|-----|--------|--------------------------|--------------------------|--------------------------|--------------------------|--------------------------|
| • about COVID-19:             | <input type="checkbox"/> |     |        | <input type="checkbox"/> |
| • about vaccination:          | <input type="checkbox"/> |     |        | <input type="checkbox"/> |
| • about COVID-19 vaccination: | <input type="checkbox"/> |     |        | <input type="checkbox"/> |

**17. INDICATE WHICH OF THE FOLLOWING SOURCES OF INFORMATION ABOUT VACCINATION FOR COVID-19 WERE MOST IMPORTANT FOR YOU (NO MORE THAN FIVE OF THE BELOW)**

- ☐ Family
- ☐ Friends or acquaintances' recommendation
- ☐ TV
- ☐ Internet
- ☐ Social network
- ☐ Newspapers (printed or on line)
- ☐ Scientific literature
- ☐ General practitioner
- ☐ International institutions (WHO or others)
- ☐ National institutions (Ministry of Health, Istituto Superiore di Sanità)
- ☐ Health service

**18. ASSESS THE INFORMATION QUALITY ABOUT COVID-19 VACCINATION IN RELATION TO THE SOURCES OF INFORMATION LISTED ABOVE**

|                                                     | Very low                 | Low                      | Medium                   | High                     | Don't know               |
|-----------------------------------------------------|--------------------------|--------------------------|--------------------------|--------------------------|--------------------------|
| ○ Family:                                           | <input type="checkbox"/> |
| ○ Friends or acquaintances' recommendation :        | <input type="checkbox"/> |
| ○ TV:                                               | <input type="checkbox"/> |
| ○ Internet:                                         | <input type="checkbox"/> |
| ○ Social network                                    | <input type="checkbox"/> |
| ○ Newspapers (printed or on line) :                 | <input type="checkbox"/> |
| ○ Scientific literature:                            | <input type="checkbox"/> |
| ○ General practitioner:                             | <input type="checkbox"/> |
| ○ International institutions (WHO or others) :      | <input type="checkbox"/> |
| ○ National institutions (Ministry of health, ISS) : | <input type="checkbox"/> |
| ○ Health service:                                   | <input type="checkbox"/> |

**19. IF YOU THINK YOU ARE NOT VACCINATING YOURSELF AGAINST COVID-19, CAN YOU INDICATE THE REASONS AMONG THOSE LISTED? (MULTIPLE ANSWERS POSSIBLE)**

- ☐ Because the COVID-19 vaccine had too short a period of testing and control
- ☐ I'm afraid of side effects
- ☐ I prefer to wait until more people have been vaccinated, or to wait until next year
- ☐ I doubt it's effective
- ☐ Covid-19 is not a serious disease / the symptoms are generally mild at least in my age group
- ☐ It is preferable to develop physiological immunity (after exposure to the disease)
- ☐ Clinical contraindication
- ☐ I have already had the disease
- ☐ Advice from a physician
- ☐ Serious side effects due to the COVID-19 vaccine are kept under wraps

**20. WOULD YOU RECOMMEND THE COVID-19 VACCINE TO YOUR PATIENTS?**

- ☐ Yes
- ☐ No
- ☐ Don't Know

**21. WOULD YOU RECOMMEND THE COVID-19 VACCINE TO YOUR FAMILY MEMBERS?**

- ☐ Yes
- ☐ No
- ☐ Don't Know

**22. DIFFERENT VACCINES ARE AVAILABLE OR NEAR AVAILABLE. CHOOSE AN ANSWER:**

- ☐ One vaccine is as good as another, having been approved by regulatory agencies (EMA, AIFA)
- ☐ It is preferable that the person receiving the vaccine can choose which vaccine to be injected
- ☐ The person receiving the vaccine must be able to choose which vaccine to be injected
- ☐ The choice of the type of vaccine must be made by the Health Authorities

**23. WHAT DO YOU THINK ABOUT THE MANDATORY COVID-19 VACCINATION FOR HEALTHCARE WORKERS?**

- ☐ It must be mandatory
- ☐ Can be recommended, but cannot be mandatory
- ☐ Other (specify)

**24. OBSERVATIONS, CRITICS, PROPOSALS?**
